# Supplementary material for: Robust glucose oxidase with a Fe3O4@C-silica nanohybrid structure
Source: Royal Society of Chemistry journal article supplement (doi:10.1039/c6tb01355d), 2016-01-01
Supplement: c6tb01355d1.pdf [file c6tb01355d1.pdf]

## Electronic Supplementary Information

### Robust glucose oxidase with Fe<sub>3</sub>O<sub>4</sub>@C-silica nanohybrid structure

Yuling Yang,<sup>a</sup> Genxing Zhu,<sup>a</sup> Guangchuan Wang,<sup>b</sup> Yali Li,<sup>c</sup> Ruikang Tang\*<sup>a,b</sup>

<sup>a</sup> Center for Biomaterials and Biopathways, Department of Chemistry, Zhejiang University, Hangzhou, Zhejiang 310027, China. \*E-mail: rtang@zju.edu.cn

<sup>b</sup> Qiushi Academy for Advanced Studies, Zhejiang University, Hangzhou, Zhejiang 310027, China.

<sup>c</sup> Befar Group Co. Ltd., Binzhou, Shandong, 256000, China.

### Figures

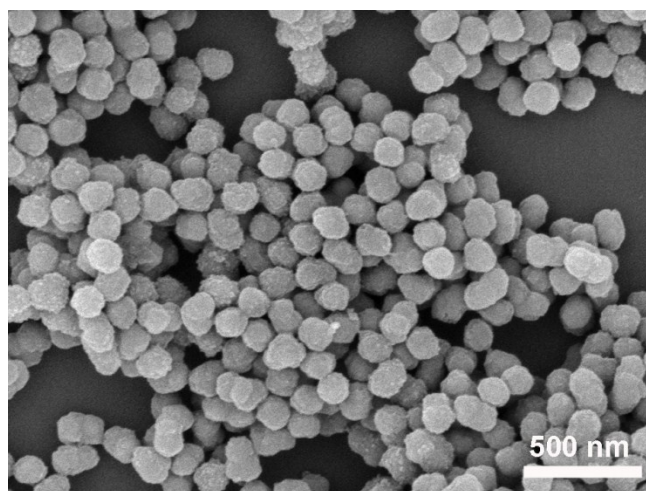

**Fig. S1** SEM image of Fe<sub>3</sub>O<sub>4</sub>@C-GOD nanoparticles.

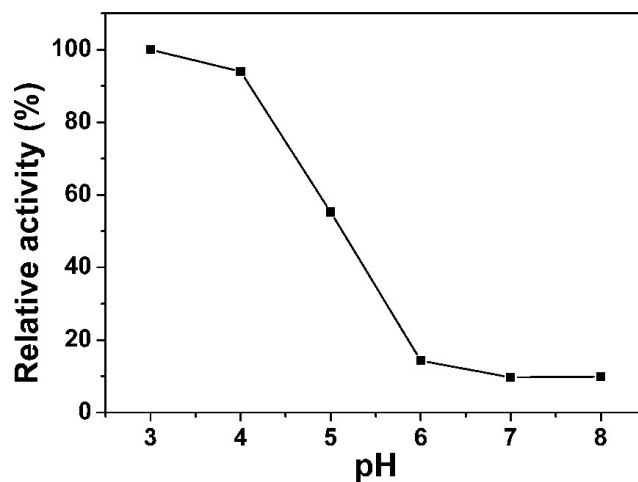

**Fig. S2** Effect of pH on the H<sub>2</sub>O<sub>2</sub> catalytic relative activity of Fe<sub>3</sub>O<sub>4</sub>@C nanoparticles. It indicated that Fe<sub>3</sub>O<sub>4</sub>@C nanoparticles showed no catalytic activity at neutral condition.

**Table S1** Absorbance of phosphate buffer solution after 7 recycled of Fe<sub>3</sub>O<sub>4</sub>@C-GOD-SiO<sub>2</sub> nanohybrids, demonstrating that the nanohybrids could be entirely recycled from solution by magnet without given a false activity during the UV-vis measurement.

| Number of cycles | Absorbance |
|------------------|------------|
| 1                | 0.0091     |
| 2                | 0.0112     |
| 3                | 0.0099     |
| 4                | 0.0047     |
| 5                | 0.0096     |
| 6                | 0.0059     |
| 7                | 0.0117     |
